# Supplementary material for: Synthesis and In Vitro Photodynamic Activity of Cationic Boron Dipyrromethene-Based Photosensitizers Against Methicillin-Resistant Staphylococcus aureus
Source: MDPI journal article supplement (doi:10.3390/biomedicines8060140), 2020-05-29
Supplement: s1 [file s1]

## Supplementary Materials

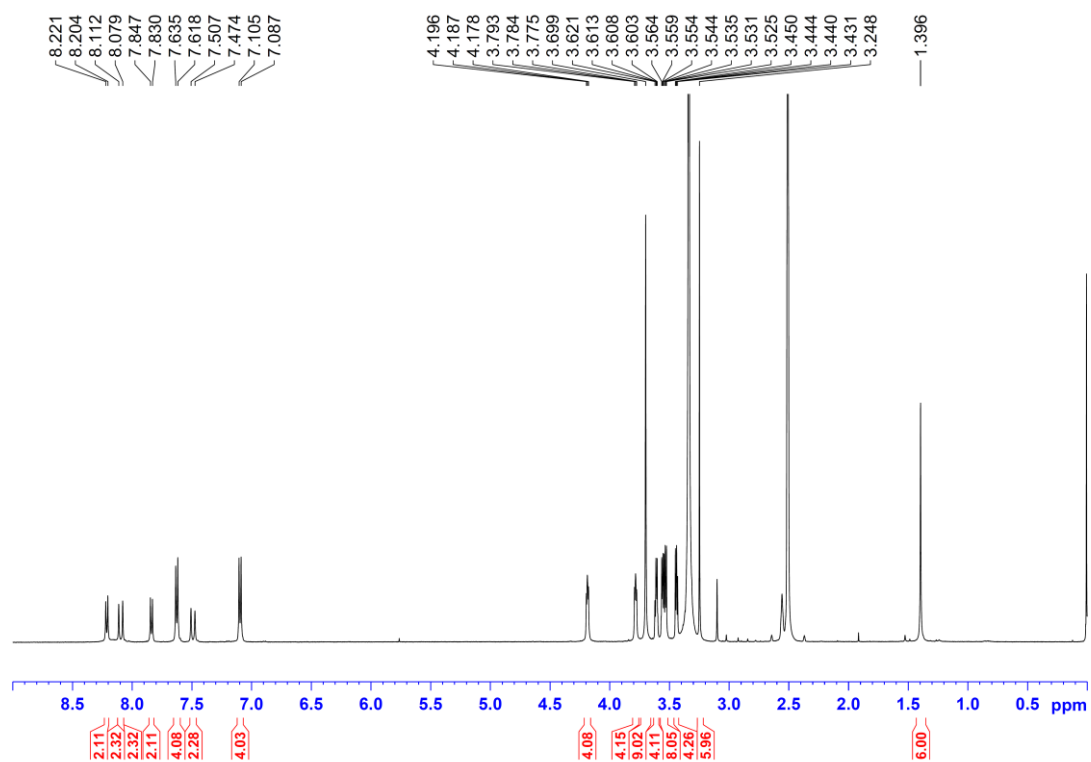

(a)

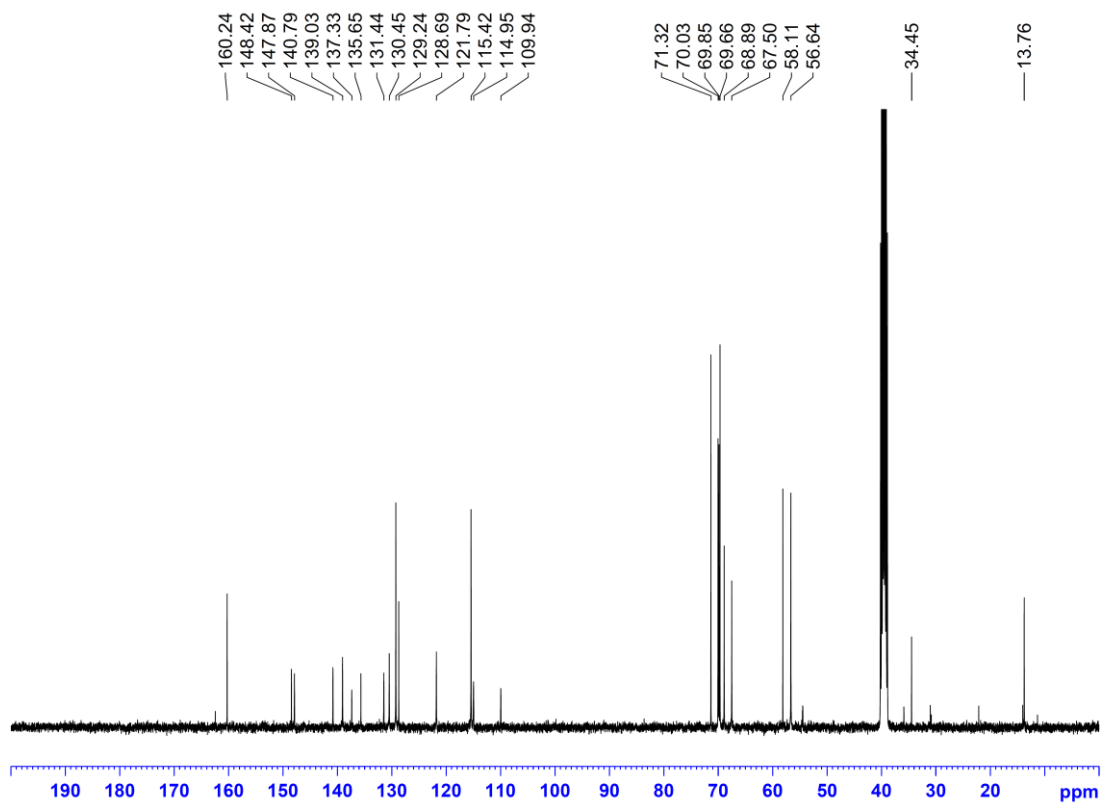

(b)

Figure S1. (a) <sup>1</sup>H and (b) <sup>13</sup>C{<sup>1</sup>H} NMR spectra of 1 in DMSO-*d*<sub>6</sub>.

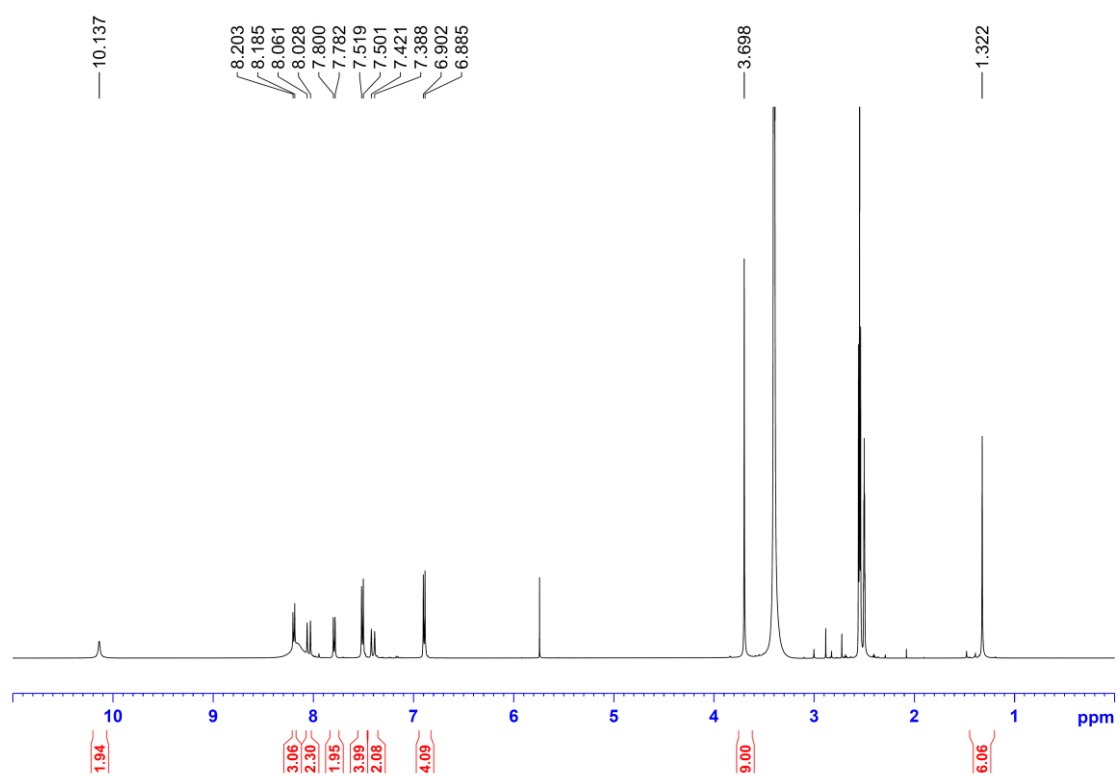

(a)

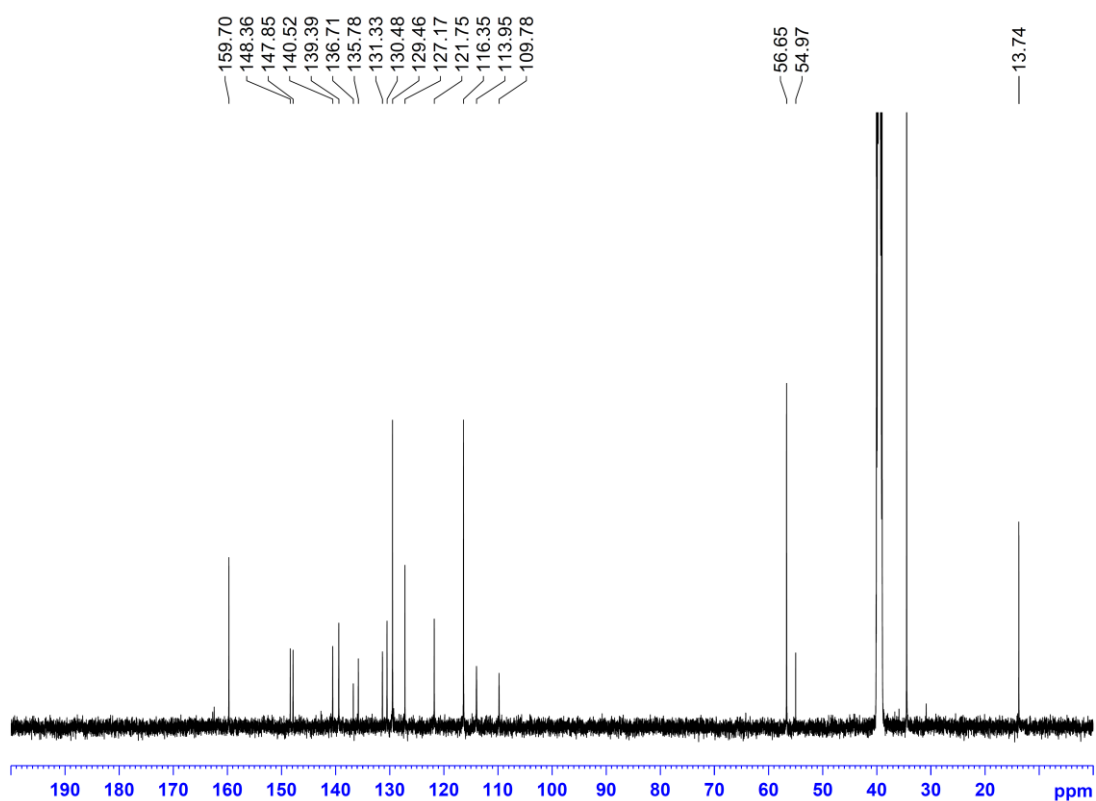

(b)

Figure S2. (a) <sup>1</sup>H and (b) <sup>13</sup>C{<sup>1</sup>H} NMR spectra of 2 in DMSO-*d*<sub>6</sub>.

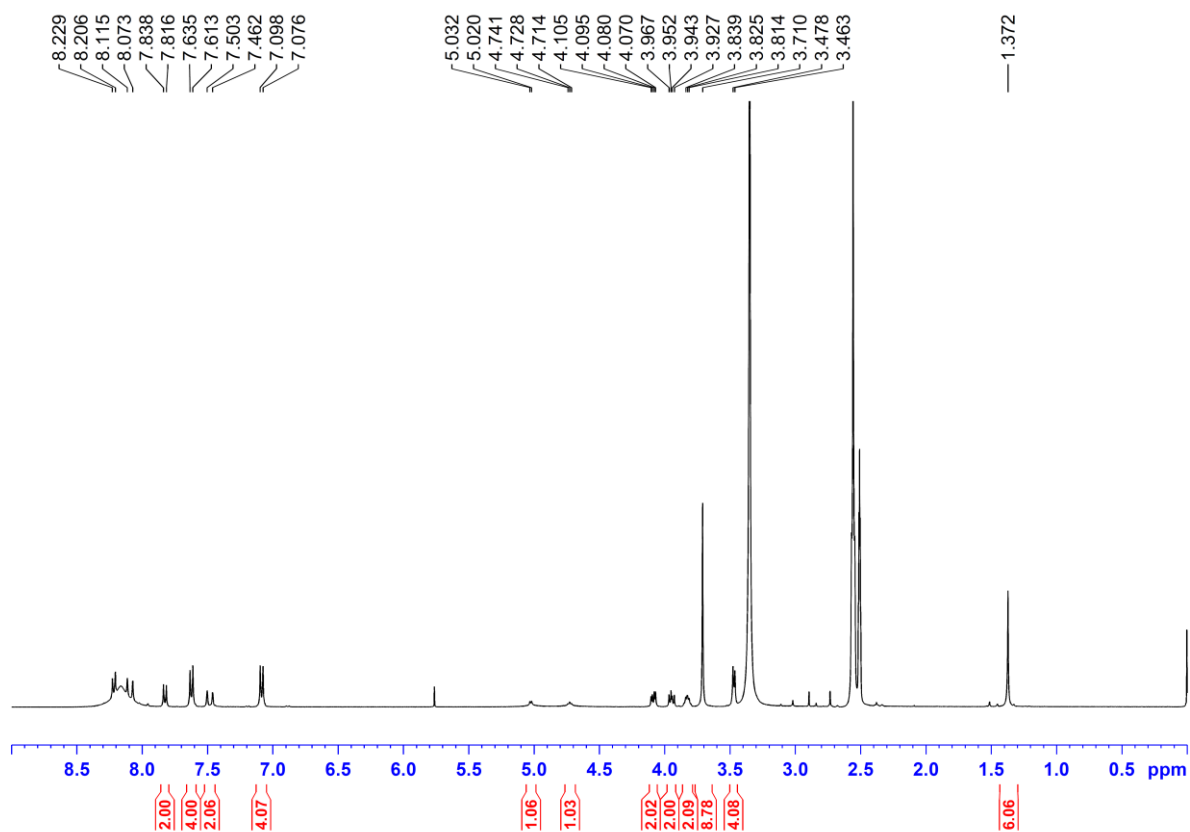

Figure S3. <sup>1</sup>H NMR spectrum of 3 in DMSO-*d*<sub>6</sub>.

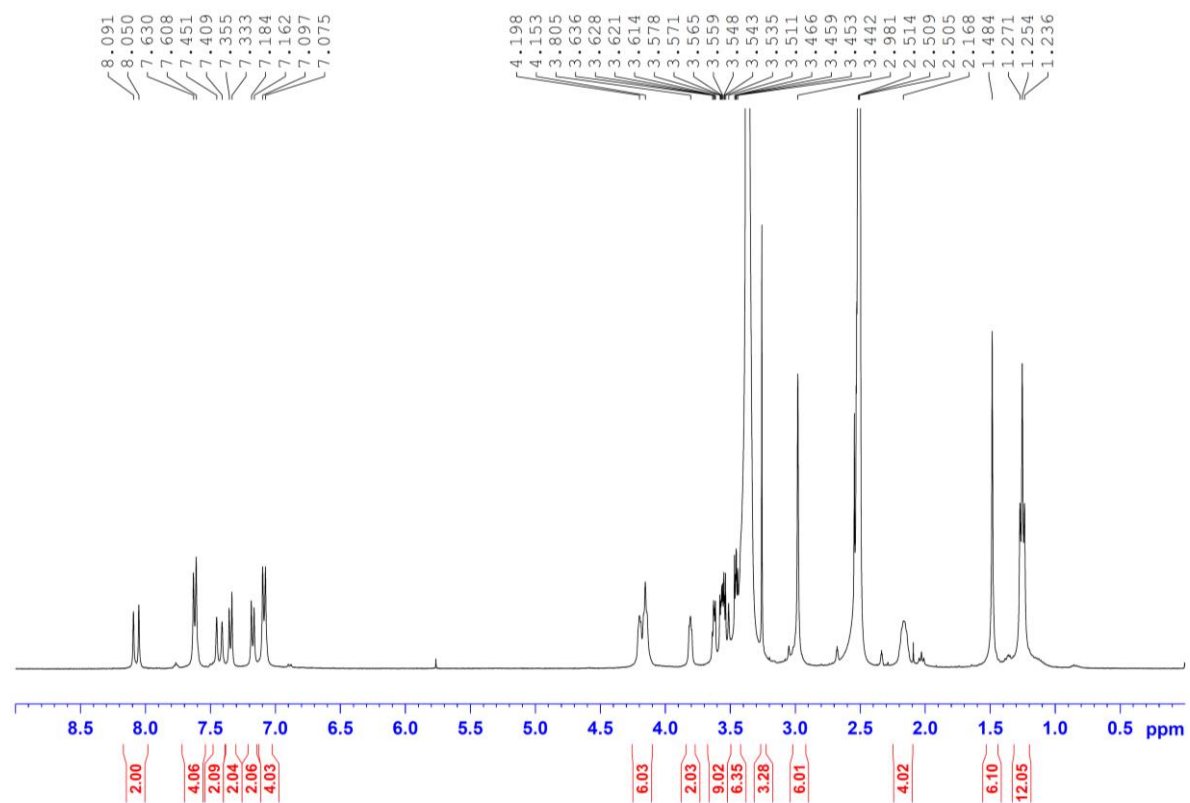

Figure S4. <sup>1</sup>H NMR spectrum of 4 in DMSO-*d*<sub>6</sub>.

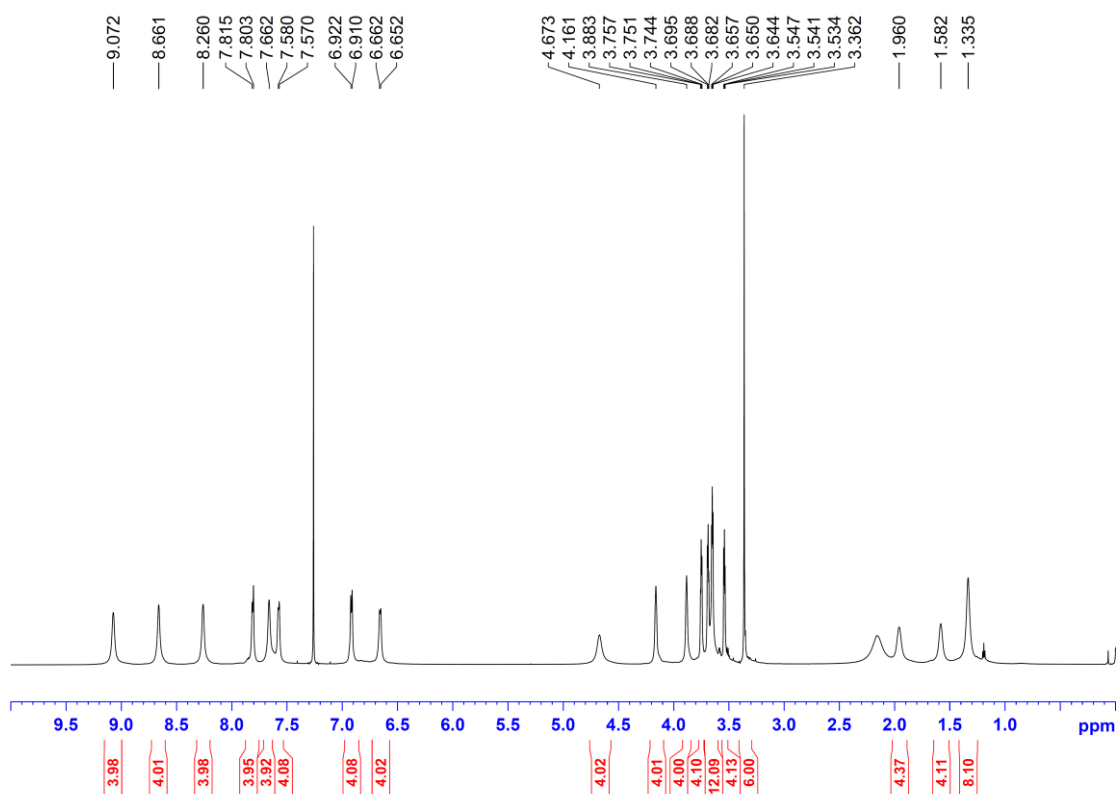

(a)

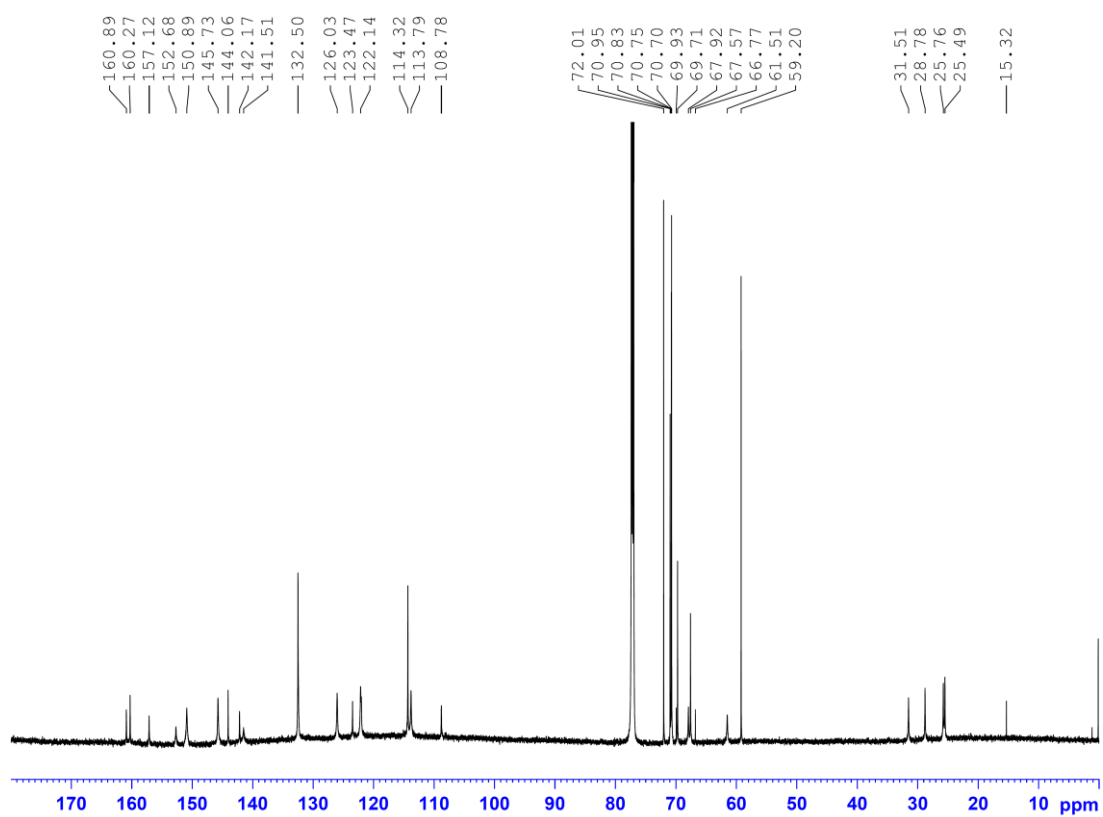

(b)

Figure S5. (a) <sup>1</sup>H and (b) <sup>13</sup>C{<sup>1</sup>H} NMR spectra of 5 in CDCl<sub>3</sub>.

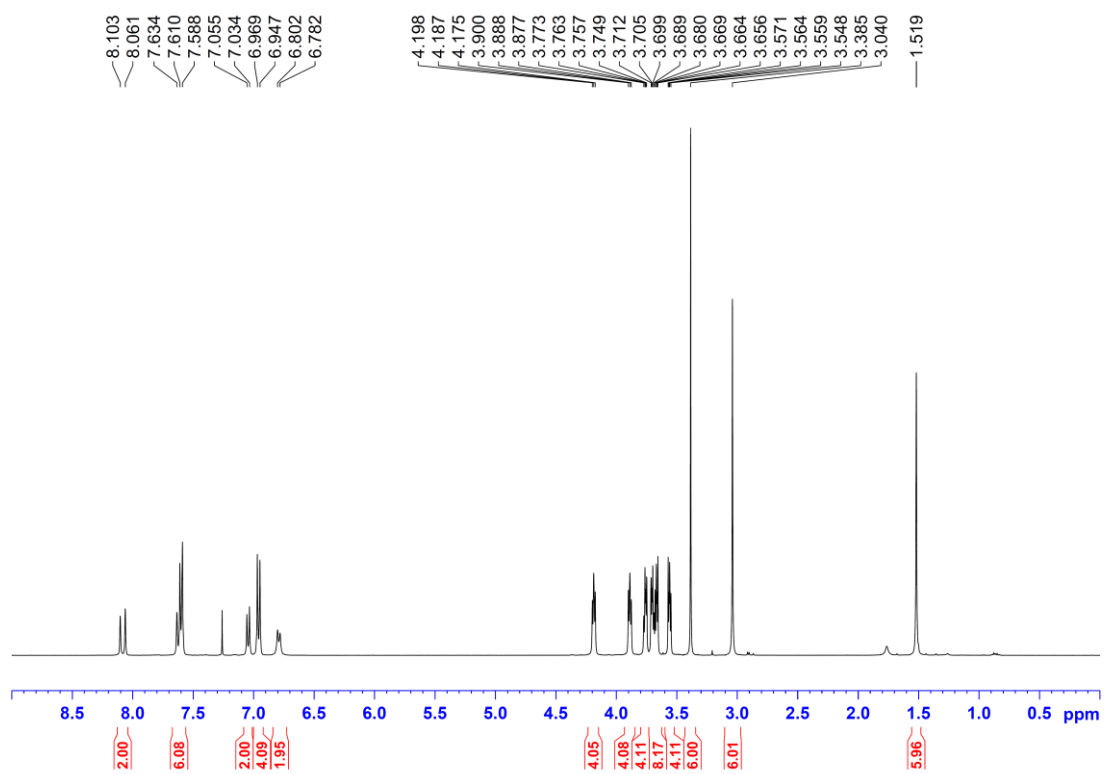

(a)

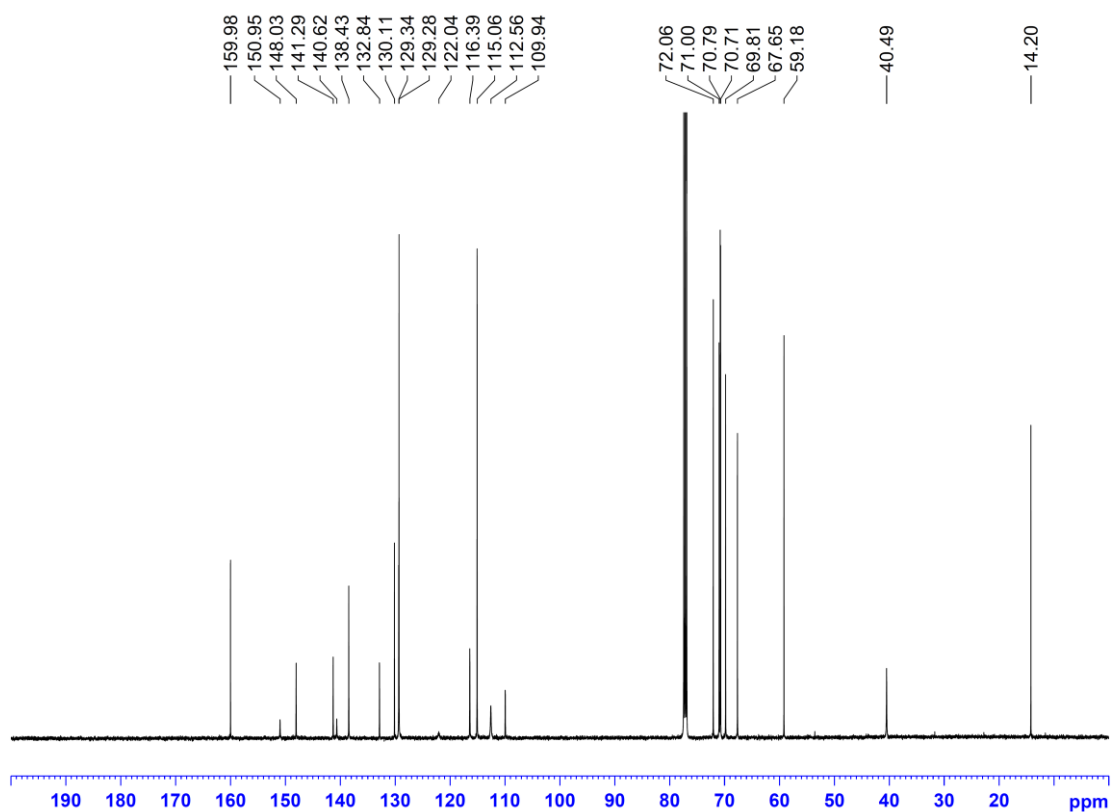

(b)

Figure S6. (a) <sup>1</sup>H and (b) <sup>13</sup>C{<sup>1</sup>H} NMR spectra of 8 in CDCl<sub>3</sub>.

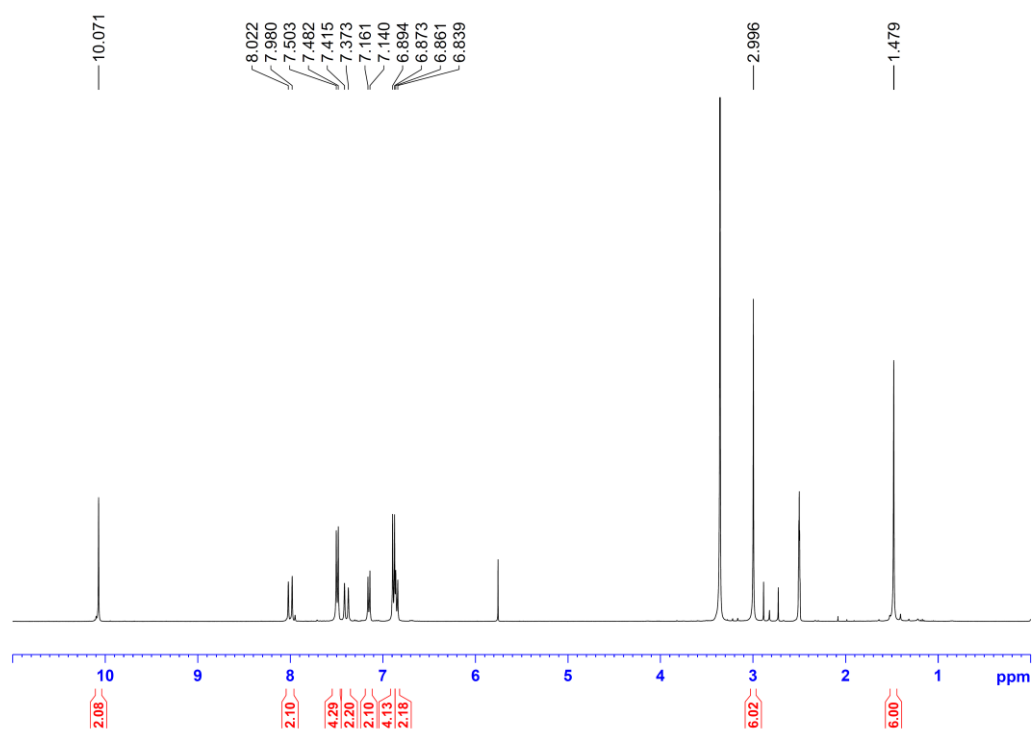

(a)

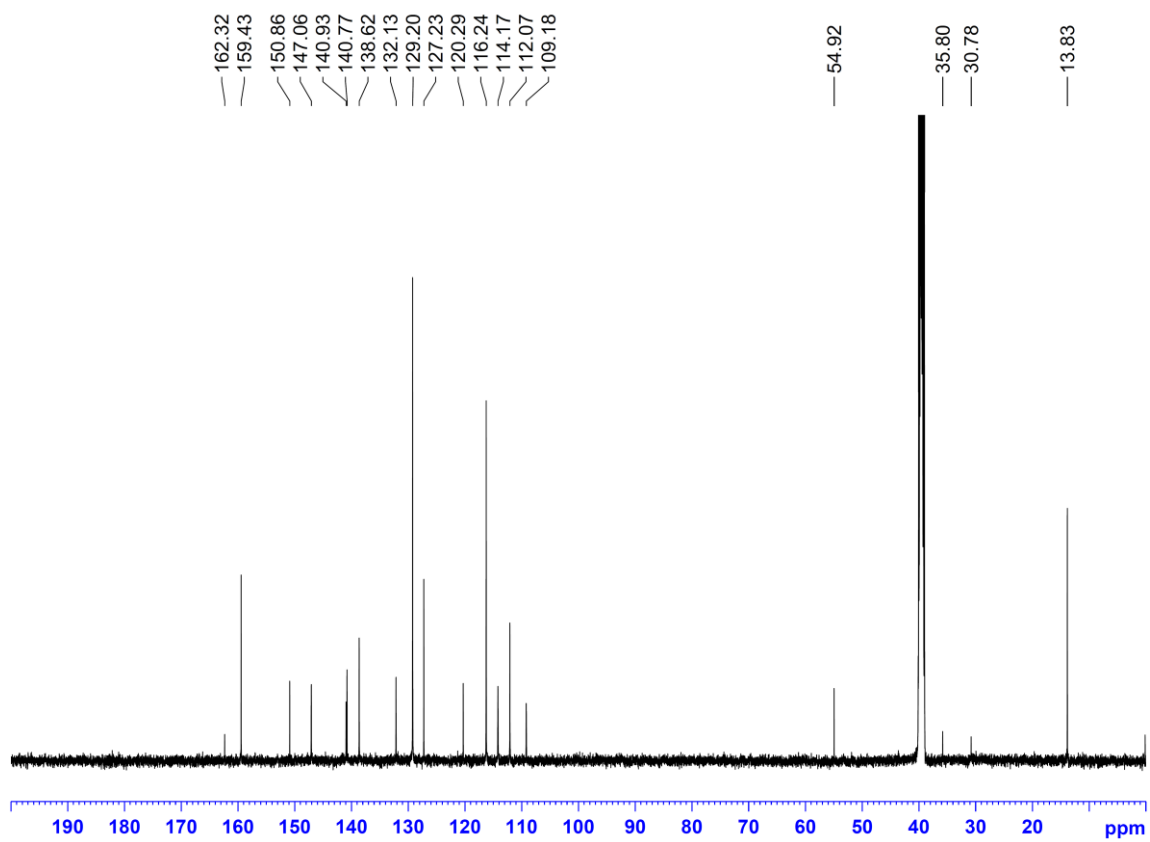

(b)

Figure S7. (a) <sup>1</sup>H and (b) <sup>13</sup>C{<sup>1</sup>H} NMR spectra of 10 in DMSO-*d*<sub>6</sub>.

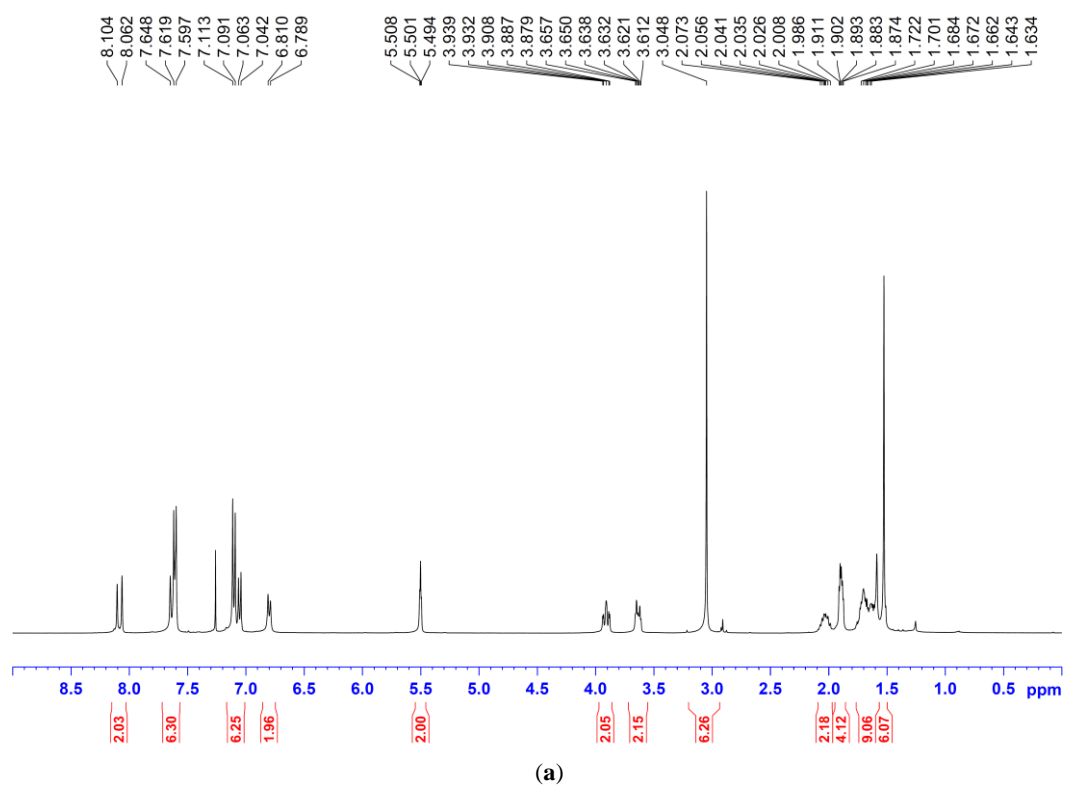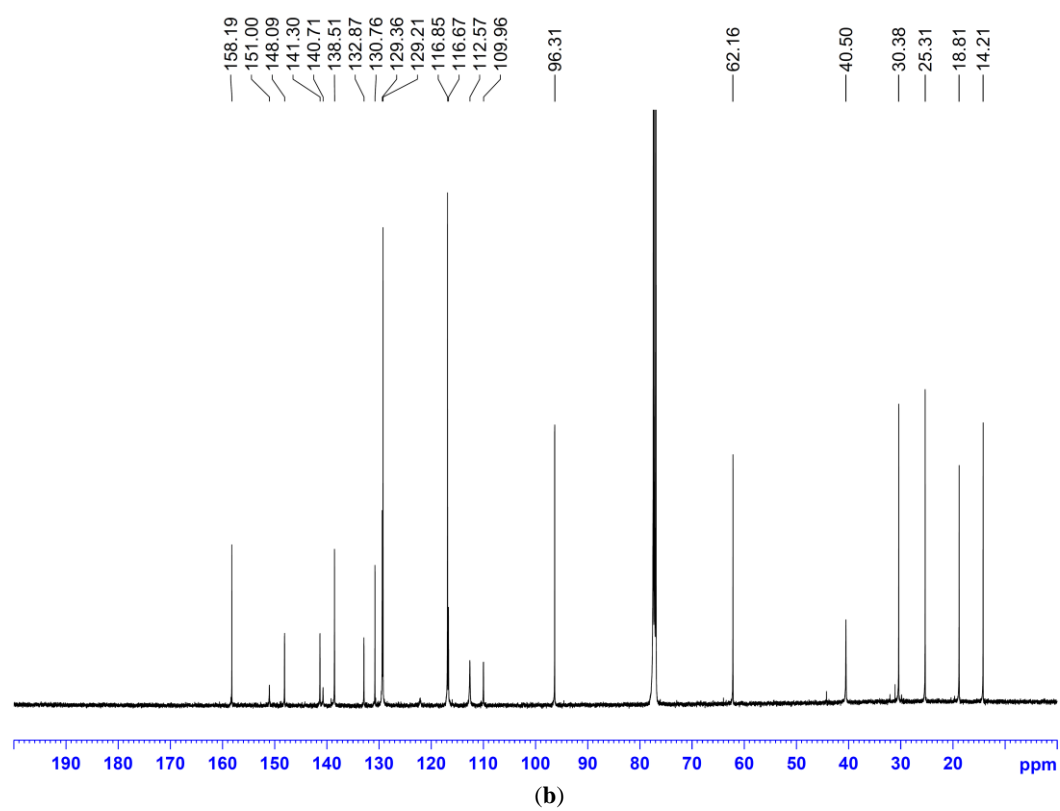

Figure S8. (a) <sup>1</sup>H and (b) <sup>13</sup>C{<sup>1</sup>H} NMR spectra of 12 in CDCl<sub>3</sub>.

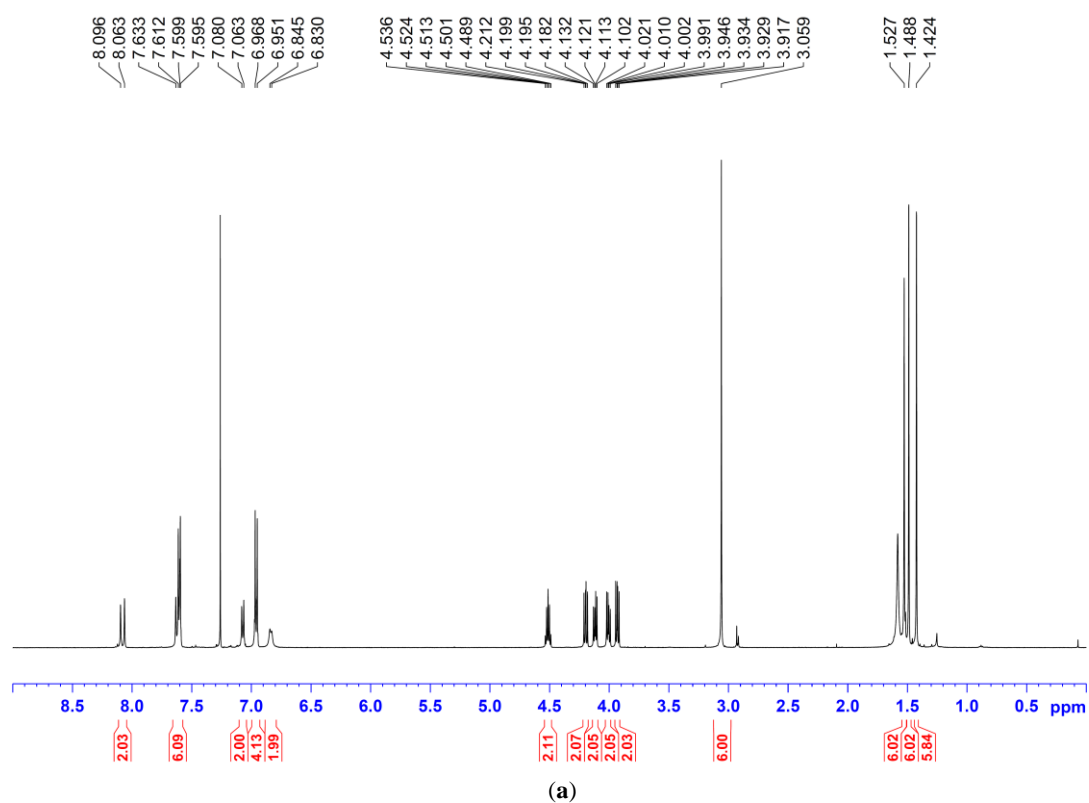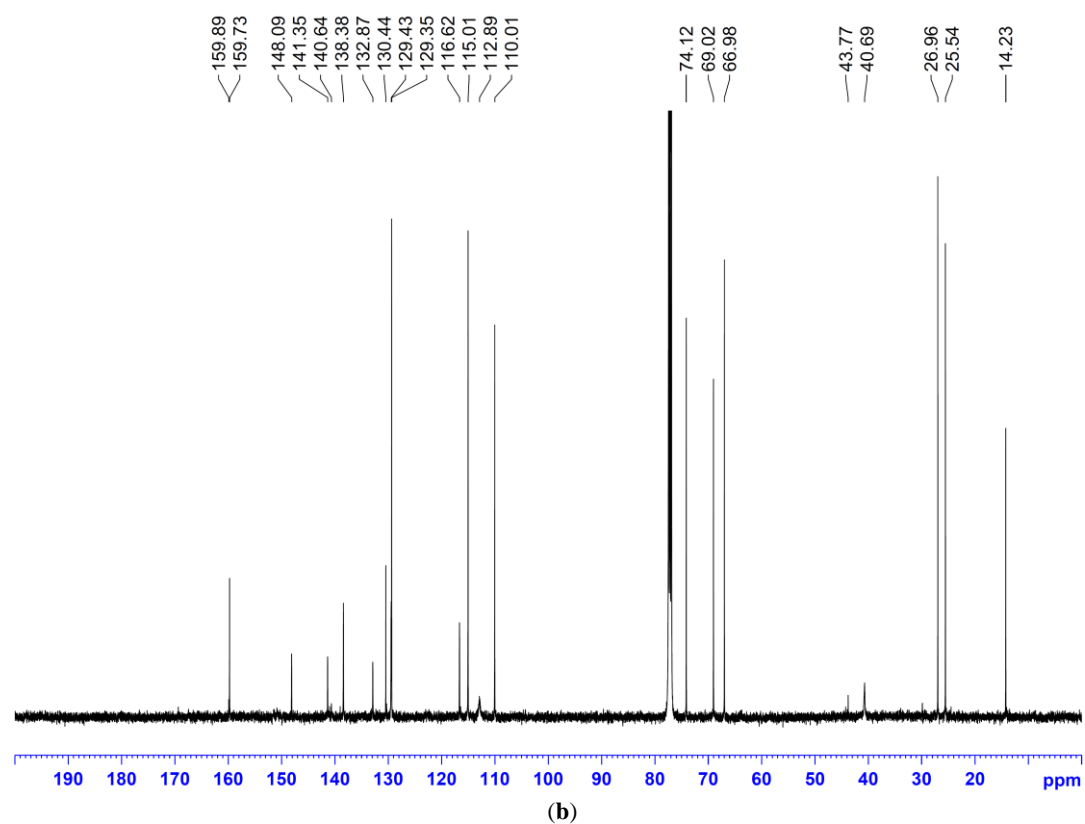

Figure S9. (a) <sup>1</sup>H and (b) <sup>13</sup>C{<sup>1</sup>H} NMR spectra of 14 in CDCl<sub>3</sub>.

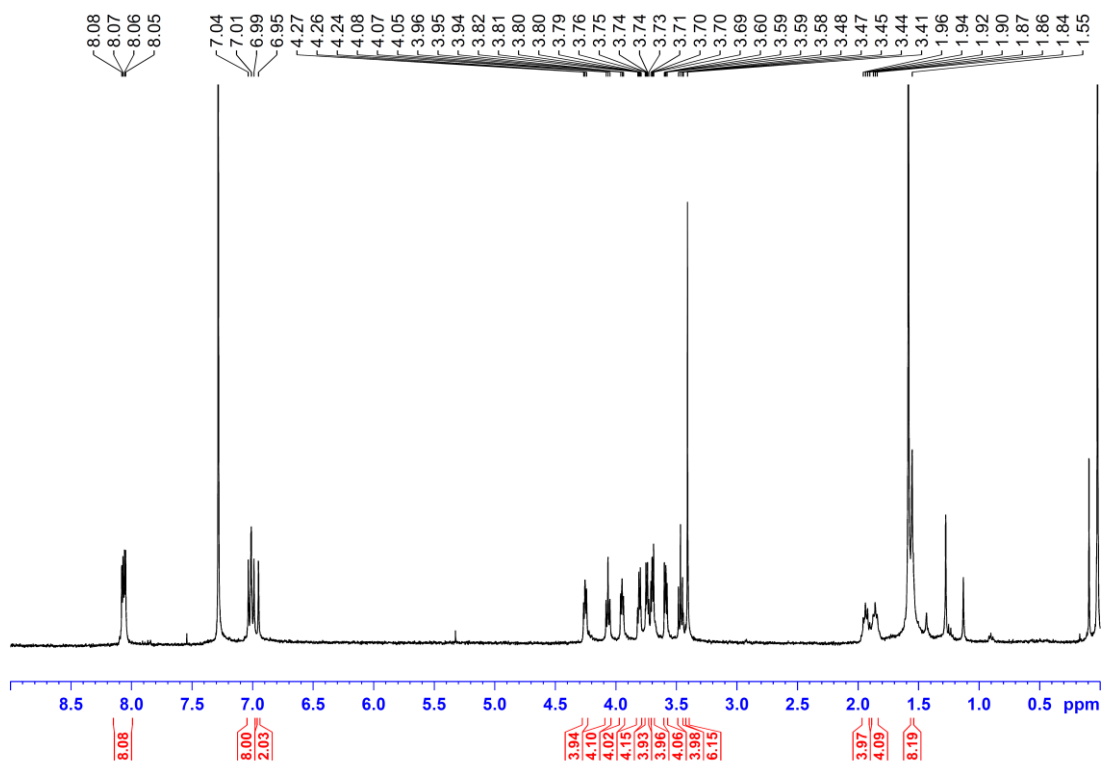

Figure S10. <sup>1</sup>H NMR spectrum of 18 in CDCl<sub>3</sub>.

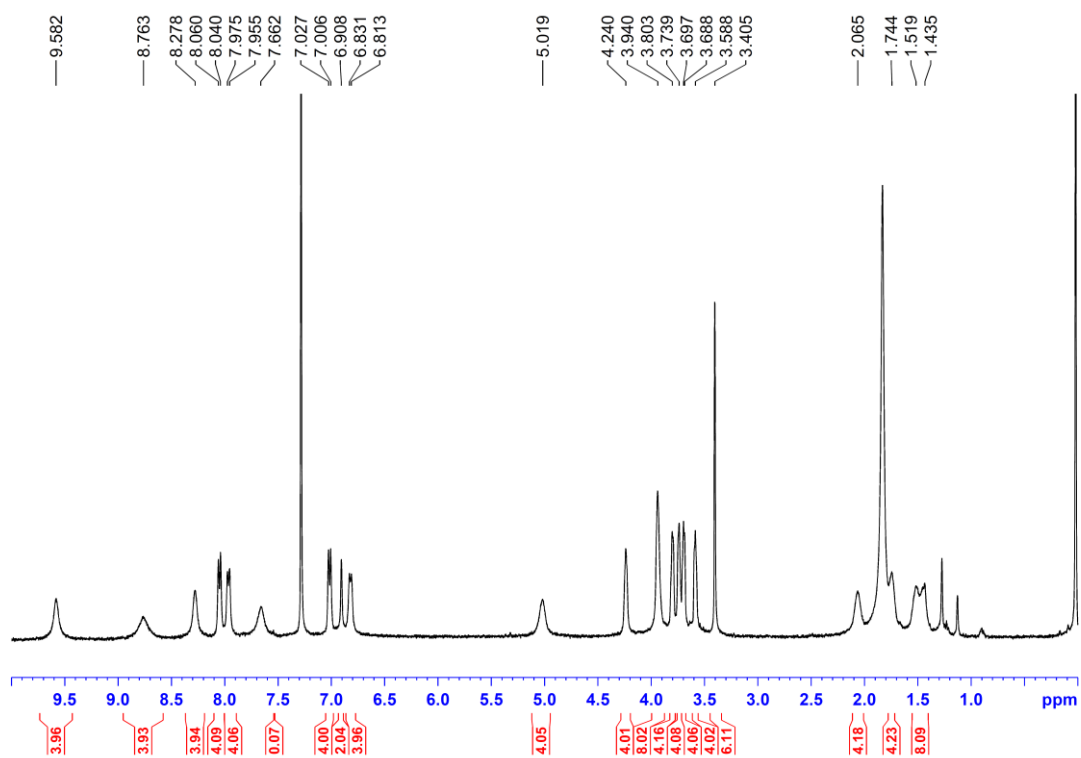

Figure S11. <sup>1</sup>H NMR spectrum of 19 in CDCl<sub>3</sub>.
